# Supplementary material for: Genome-wide identification and expression analysis of the trehalose-6-phosphate synthase (TPS) gene family in cucumber (Cucumis sativus L.)
Source: PeerJ. 2021 Apr 30;9:e11398. doi: 10.7717/peerj.11398 (PMC8092105; doi:10.7717/peerj.11398)
Supplement: Supplemental Information 3 [file peerj-09-11398-s003.xlsx]

## Sheet: Sheet1
Supplementary file 3. Cis-acting elements of CsTPSs in promoter region.
Type	Name	Annotation	CsTPS1	CsTPS2	CsTPS3	CsTPS4	CsTPS5	CsTPS6	CsTPS7
Common cis-acting element	CAAT-box	common cis-acting element in promoter and enhancer regions	35	44	34	45	36	28	45
	TATA-box	core promoter element around -30 of transcription start	33	40	64	38	31	33	46
Plant growth and development	CAT-box	cis-acting regulatory element related to meristem expression					2	1
	circadian	cis-acting regulatory element involved in circadian control	1						1
	GCN4_motif	cis-regulatory element involved in endosperm expression			1				1
	HD-Zip 1	element involved in differentiation of the palisade mesophyll cells			1
	O2-site	cis-acting regulatory element involved in zein metabolism regulation	1	1		1	1
Stress-related cis-element	ARE	cis-acting regulatory element essential for the anaerobic induction	2	5	3		7	4
	LTR	cis-acting element involved in low-temperature responsiveness			2	1	1	1
	MBS	MYB binding site involved in drought-inducibility	1			1	5	2
	MYB	stress response element	6	5	4	3	4	4	5
	MYC	the recognition site of cold-resistant element	3	3	4		2	2	3
	TC-rich repeats	cis-acting element involved in defense and stress responsiveness	1		1		1
	WUN-motif	wound-responsive element	1			1		2	2
Hormone-related cis-element	ABRE	cis-acting element involved in the abscisic acid responsiveness		1		1	3	11	2
	CGTCA-motif	cis-acting regulatory element involved in the MeJA-responsiveness					2	1	1
	ERE	ethylene-responsive element	2	2	3	4	1		1
	GARE-motif	gibberellin-responsive element	2		1	1
	P-box	gibberellin-responsive element				2		1	1
	TATC-box	cis-acting element involved in gibberellin-responsiveness							1
	TCA-element	cis-acting element involved in salicylic acid responsiveness	1	3		2		2
	TGACG-motif	cis-acting regulatory element involved in the MeJA-responsiveness					2	1	1
	TGA-element	auxin-responsive element	2	1		1
Light-responsive element	AAAC-motif	light responsive element		1
	ACE	cis-acting element involved in light responsiveness						1	1
	AE-box	part of a module for light response		1	2	1	1	1
	AT1-motif	part of a light responsive module		1
	ATC-motif	part of a conserved DNA module involved in light responsiveness				1
	ATCT-motif	part of a conserved DNA module involved in light responsiveness						1	1
	Box 4	part of a conserved DNA module involved in light responsiveness	2	2	3	1	2		1
	Box II	part of a light responsive element						1
	CAG-motif	part of a light response element						1
	chs-CMA1a	part of a light responsive element		1
	chs-CMA2a	part of a light responsive element				2
	chs-Unit 1 m1	part of a light responsive element	1
	GA-motif	part of a light responsive element		1		1	1
	GATA-motif	part of a light responsive element	6	1		1		2	1
	GATT-motif	part of a light responsive element					1
	G-Box	cis-acting regulatory element involved in light responsiveness		3		1	2	10	2
	GT1-motif	light responsive element		2			1		2
	I-box	part of a light responsive element	3	1				2
	MRE	MYB binding site involved in light responsiveness	1			1		1
	TCCC-motif	part of a light responsive element	1		2			1
	TCT-motif	part of a light responsive element	2	1	2	1	1
Other elements	AAGAA-motif	cis-acting regulatory element		7	3	1	4	4	2
	ABRE2	cis-acting regulatory element						1
	ABRE3a	cis-acting regulatory element						1
	ABRE4	cis-acting regulatory element						1
	ACTCATCCT sequence	cis-acting regulatory element						1
	AP-1	cis-acting regulatory element					1
	as-1	cis-acting regulatory element					2	1	1
	AT~ABRE	cis-acting regulatory element						1
	AT~TATA-box	cis-acting regulatory element	2	5	9	2	5	3	3
	Box III	protein binding site			1
	box S	cis-acting regulatory element					1
	CCAAT-box	MYBHv1 binding site					1	1
	CTAG-motif	cis-acting regulatory element			1
	DRE core	cis-acting regulatory element						1
	DRE1	cis-acting regulatory element			1
	F-box	cis-acting regulatory element				1			1
	GC-motif	cis-acting regulatory element						1
	HD-Zip 3	protein binding site			1
	MYB recognition site	cis-acting regulatory element					1	1
	Myb-binding site	cis-acting regulatory element	2	1	2	2
	MYB-like sequence	cis-acting regulatory element	3	3	1		1	2	2
	re2f-1	cis-acting regulatory element						1
	RY-element	cis-acting regulatory element involved in seed-specific regulation				1
	STRE	cis-acting regulatory element	3			1		2	1
	TATA	cis-acting regulatory element			2				2
	TCA	cis-acting regulatory element	1	2		1
	W-box	WRKY binding site involved in abiotic stress and defense response	1		1	1
	WRE3	cis-acting regulatory element	2	1				3
