# Supplementary material for: Genome-wide identification and expression analysis of the trehalose-6-phosphate synthase (TPS) gene family in cucumber (Cucumis sativus L.)
Source: PeerJ. 2021 Apr 30;9:e11398. doi: 10.7717/peerj.11398 (PMC8092105; doi:10.7717/peerj.11398)
Supplement: Supplemental Information 4 [file peerj-09-11398-s004.xlsx]

## Sheet: Sheet1
Supplementary file 4. GO annotation of cucumber TPS proteins.
Molecular function (MF)	GO	Number	Protein ID
UDP-glycosyltransferase activity	GO:0009058	7	CsTPS1/CsTPS2/CsTPS3/CsTPS4/CsTPS5/CsTPS6/CsTPS7
hydrolase activity	GO:0016787	7	CsTPS1/CsTPS2/CsTPS3/CsTPS4/CsTPS5/CsTPS6/CsTPS7
phosphatase activity	GO:0016791	7	CsTPS1/CsTPS2/CsTPS3/CsTPS4/CsTPS5/CsTPS6/CsTPS7
molecular_function	GO:0005575	6	CsTPS1/CsTPS3/CsTPS4/CsTPS5/CsTPS6/CsTPS7
catalytic activity	GO:0005622	6	CsTPS1/CsTPS3/CsTPS4/CsTPS5/CsTPS6/CsTPS7
alpha,alpha-trehalose-phosphate synthase (UDP-forming) activity	GO:0005623	6	CsTPS1/CsTPS3/CsTPS4/CsTPS5/CsTPS6/CsTPS7
transferase activity	GO:0016740	2	CsTPS2/CsTPS4
phosphoric ester hydrolase activity	GO:0044085	2	CsTPS2/CsTPS4
glucosyltransferase activity	GO:0048316	2	CsTPS2/CsTPS4
Biological process (BP)	GO	Number	Protein ID
metabolic process	GO:0003824	7	CsTPS1/CsTPS2/CsTPS3/CsTPS4/CsTPS5/CsTPS6/CsTPS7
carbohydrate metabolic process	GO:0005991	7	CsTPS1/CsTPS2/CsTPS3/CsTPS4/CsTPS5/CsTPS6/CsTPS7
disaccharide metabolic process	GO:0005992	7	CsTPS1/CsTPS2/CsTPS3/CsTPS4/CsTPS5/CsTPS6/CsTPS7
trehalose metabolic process	GO:0006793	7	CsTPS1/CsTPS2/CsTPS3/CsTPS4/CsTPS5/CsTPS6/CsTPS7
trehalose biosynthetic process	GO:0006796	7	CsTPS1/CsTPS2/CsTPS3/CsTPS4/CsTPS5/CsTPS6/CsTPS7
phosphorus metabolic process	GO:0006950	7	CsTPS1/CsTPS2/CsTPS3/CsTPS4/CsTPS5/CsTPS6/CsTPS7
multicellular organism development	GO:0008150	7	CsTPS1/CsTPS2/CsTPS3/CsTPS4/CsTPS5/CsTPS6/CsTPS7
embryo development	GO:0008152	7	CsTPS1/CsTPS2/CsTPS3/CsTPS4/CsTPS5/CsTPS6/CsTPS7
biosynthetic process	GO:0009311	7	CsTPS1/CsTPS2/CsTPS3/CsTPS4/CsTPS5/CsTPS6/CsTPS7
oligosaccharide metabolic process	GO:0009312	7	CsTPS1/CsTPS2/CsTPS3/CsTPS4/CsTPS5/CsTPS6/CsTPS7
cellular process	GO:0009987	7	CsTPS1/CsTPS2/CsTPS3/CsTPS4/CsTPS5/CsTPS6/CsTPS7
carbohydrate biosynthetic process	GO:0016051	7	CsTPS1/CsTPS2/CsTPS3/CsTPS4/CsTPS5/CsTPS6/CsTPS7
dephosphorylation	GO:0016311	7	CsTPS1/CsTPS2/CsTPS3/CsTPS4/CsTPS5/CsTPS6/CsTPS7
multicellular organismal process	GO:0033554	7	CsTPS1/CsTPS2/CsTPS3/CsTPS4/CsTPS5/CsTPS6/CsTPS7
developmental process	GO:0034637	7	CsTPS1/CsTPS2/CsTPS3/CsTPS4/CsTPS5/CsTPS6/CsTPS7
cell wall biogenesis	GO:0042578	7	CsTPS1/CsTPS2/CsTPS3/CsTPS4/CsTPS5/CsTPS6/CsTPS7
cellular component biogenesis	GO:0044237	7	CsTPS1/CsTPS2/CsTPS3/CsTPS4/CsTPS5/CsTPS6/CsTPS7
cellular metabolic process	GO:0044238	7	CsTPS1/CsTPS2/CsTPS3/CsTPS4/CsTPS5/CsTPS6/CsTPS7
primary metabolic process	GO:0044249	7	CsTPS1/CsTPS2/CsTPS3/CsTPS4/CsTPS5/CsTPS6/CsTPS7
cellular biosynthetic process	GO:0044262	7	CsTPS1/CsTPS2/CsTPS3/CsTPS4/CsTPS5/CsTPS6/CsTPS7
regulation of cellular process	GO:0050896	7	CsTPS1/CsTPS2/CsTPS3/CsTPS4/CsTPS5/CsTPS6/CsTPS7
cell division	GO:0051716	7	CsTPS1/CsTPS2/CsTPS3/CsTPS4/CsTPS5/CsTPS6/CsTPS7
biological regulation	GO:0070413	7	CsTPS1/CsTPS2/CsTPS3/CsTPS4/CsTPS5/CsTPS6/CsTPS7
organic substance metabolic process	GO:0071704	7	CsTPS1/CsTPS2/CsTPS3/CsTPS4/CsTPS5/CsTPS6/CsTPS7
organic substance biosynthetic process	GO:1901576	7	CsTPS1/CsTPS2/CsTPS3/CsTPS4/CsTPS5/CsTPS6/CsTPS7
cellular carbohydrate metabolic process	GO:0044424	6	CsTPS1/CsTPS3/CsTPS4/CsTPS5/CsTPS6/CsTPS7
reproduction	GO:0000003	2	CsTPS2/CsTPS4
developmental process involved in reproduction	GO:0003825	2	CsTPS2/CsTPS4
signal transduction	GO:0005829	2	CsTPS6/CsTPS7
phosphate-containing compound metabolic process	GO:0007154	2	CsTPS2/CsTPS4
response to stress	GO:0007165	2	CsTPS2/CsTPS4
cell communication	GO:0007275	2	CsTPS2/CsTPS4
biological_process	GO:0008194	2	CsTPS2/CsTPS4
oligosaccharide biosynthetic process	GO:0009743	2	CsTPS2/CsTPS4
response to carbohydrate	GO:0009756	2	CsTPS2/CsTPS4
carbohydrate mediated signaling	GO:0009790	2	CsTPS2/CsTPS4
post-embryonic development	GO:0009791	2	CsTPS2/CsTPS4
embryo development ending in seed dormancy	GO:0009793	2	CsTPS2/CsTPS4
plant-type cell wall biogenesis	GO:0009832	2	CsTPS2/CsTPS4
response to organic substance	GO:0010033	2	CsTPS2/CsTPS4
fruit development	GO:0010154	2	CsTPS2/CsTPS4
sugar mediated signaling pathway	GO:0010182	2	CsTPS2/CsTPS4
reproductive process	GO:0022414	2	CsTPS2/CsTPS4
cellular response to stress	GO:0023052	2	CsTPS2/CsTPS4
signaling	GO:0032501	2	CsTPS2/CsTPS4
cellular response to chemical stimulus	GO:0032502	2	CsTPS2/CsTPS4
cellular carbohydrate biosynthetic process	GO:0035251	2	CsTPS2/CsTPS4
response to chemical	GO:0042546	2	CsTPS2/CsTPS4
disaccharide biosynthetic process	GO:0046527	2	CsTPS2/CsTPS4
seed development	GO:0048608	2	CsTPS2/CsTPS4
reproductive structure development	GO:0048731	2	CsTPS2/CsTPS4
system development	GO:0048856	2	CsTPS2/CsTPS4
anatomical structure development	GO:0050789	2	CsTPS2/CsTPS4
regulation of biological process	GO:0050794	2	CsTPS2/CsTPS4
response to stimulus	GO:0051301	2	CsTPS2/CsTPS4
cellular response to stimulus	GO:0061458	2	CsTPS2/CsTPS4
reproductive system development	GO:0065007	2	CsTPS2/CsTPS4
trehalose metabolism in response to stress	GO:0070887	2	CsTPS2/CsTPS4
cellular response to organic substance	GO:0071310	2	CsTPS2/CsTPS4
cellular response to carbohydrate stimulus	GO:0071322	2	CsTPS2/CsTPS4
cell wall organization or biogenesis	GO:0071554	2	CsTPS2/CsTPS4
plant-type cell wall organization or biogenesis	GO:0071669	2	CsTPS2/CsTPS4
cellular component organization or biogenesis	GO:0071840	2	CsTPS2/CsTPS4
response to oxygen-containing compound	GO:1901700	2	CsTPS2/CsTPS4
cellular response to oxygen-containing compound	GO:1901701	2	CsTPS2/CsTPS4
Cellular component (CC)	GO	Number	Protein ID
cell	GO:0005975	7	CsTPS1/CsTPS2/CsTPS3/CsTPS4/CsTPS5/CsTPS6/CsTPS7
cytoplasm	GO:0005984	7	CsTPS1/CsTPS2/CsTPS3/CsTPS4/CsTPS5/CsTPS6/CsTPS7
cell part	GO:0046351	7	CsTPS1/CsTPS2/CsTPS3/CsTPS4/CsTPS5/CsTPS6/CsTPS7
cytosol	GO:0005737	6	CsTPS1/CsTPS3/CsTPS4/CsTPS5/CsTPS6/CsTPS7
cytoplasmic part	GO:0044464	6	CsTPS1/CsTPS3/CsTPS4/CsTPS5/CsTPS6/CsTPS7
intracellular	GO:0003006	2	CsTPS2/CsTPS4
intracellular part	GO:0044444	2	CsTPS6/CsTPS7
