# Supplementary material for: Genome-wide identification and expression analysis of the trehalose-6-phosphate synthase (TPS) gene family in cucumber (Cucumis sativus L.)
Source: PeerJ. 2021 Apr 30;9:e11398. doi: 10.7717/peerj.11398 (PMC8092105; doi:10.7717/peerj.11398)
Supplement: Supplemental Information 5 [file peerj-09-11398-s005.xlsx]

## Sheet: Stress, hormone tissue
supplementary file 5. qRT-PCR data.
	Treatments	Ct(Gene)	Ct(Actin)	△Ct	△△Ct	Relative expression	Average expression
TPS1	con（biological replicates）	23.06	30.9	-7.84	0	1	1
		23.38	31.32	-7.94	0	1
		23.15	31.25	-8.1	0	1
	PEG-6h	23.02	28.95	-5.93	1.91	0.266093	0.336543
		23.13	29.4	-6.27	1.67	0.314253
		23.17	30.05	-6.88	1.22	0.429283
	PEG-12h	24.83	31.12	-6.29	1.55	0.34151	0.354271
		24.02	30.88	-6.86	1.08	0.473029
		24.48	30.57	-6.09	2.01	0.248273
	PEG-24h	23.21	33.71	-10.5	-2.66	6.32033	5.87149
		23.31	33.83	-10.52	-2.58	5.9794
		23.08	33.59	-10.51	-2.41	5.31474
	NaCl-6h	22.17	31.78	-9.61	-1.77	3.41054	3.56856
		22.78	32.17	-9.39	-1.45	2.73208
		22.99	33.28	-10.29	-2.19	4.56305
	NaCl-12h	25.27	34.33	-9.06	-1.22	2.32947	1.69724
		25.59	34.12	-8.53	-0.59	1.50525
		25.46	33.89	-8.43	-0.33	1.25701
	NaCl-24h	24.35	37.4	-13.05	-5.21	37.014	36.0923
		24.03	37.11	-13.08	-5.14	35.261
		23.61	36.88	-13.27	-5.17	36.0019
	H2O2-6h	21.94	27.66	-5.72	2.12	0.230047	0.207374
		22	27.3	-5.3	2.64	0.160428
		22.08	28.07	-5.99	2.11	0.231647
	H2O2-12h	20.17	27.2	-7.03	0.81	0.570382	0.492241
		20.28	27.17	-6.89	1.05	0.482968
		20.18	27.04	-6.86	1.24	0.423373
	H2O2-24h	19.96	27.55	-7.59	0.25	0.840896	0.719774
		20.51	27.95	-7.44	0.5	0.707107
		20.66	28.05	-7.39	0.71	0.61132
	IAA-6h	22.37	25.39	-3.02	4.82	0.0354026	0.036457
		22.43	25.89	-3.46	4.48	0.0448111
		22.53	25.53	-3	5.1	0.0291573
	IAA-12h	23.56	28.86	-5.3	2.54	0.171943	0.171219
		23.53	28.97	-5.44	2.5	0.176777
		23.66	29.16	-5.5	2.6	0.164938
	IAA-24h	22.56	30.57	-8.01	-0.17	1.12506	1.07997
		22.6	30.66	-8.06	-0.12	1.08673
		22.75	30.89	-8.14	-0.04	1.02811
	Root	23.7	35.55	-11.85	0	1	1
		23.83	35.5	-11.67	0	1
		24.17	35.47	-11.3	0	1
	Stem	21.59	26.63	-5.04	6.81	0.00891222	0.009779
		21.77	26.89	-5.12	6.55	0.0106722
		21.61	26.23	-4.62	6.68	0.00975258
	Leaf	22.85	31.3	-8.45	3.4	0.0947323	0.106278
		23.2	31.63	-8.43	3.24	0.105843
		23.28	31.5	-8.22	3.08	0.118257
	Treatments	Ct(Gene)	Ct(Actin)	△Ct	△△Ct	Relative expression	Average expression
TPS2	con	23.99	30.9	-6.91	0	1	1
		24.02	31.32	-7.3	0	1
		24.08	31.25	-7.17	0	1
	PEG-6h	23.46	28.95	-5.49	1.42	0.373712	0.401066
		24.19	29.4	-5.21	2.09	0.234881
		23.63	30.05	-6.42	0.75	0.594604
	PEG-12h	24.88	31.12	-6.24	0.67	0.628507	0.628668
		24.21	30.88	-6.67	0.63	0.646176
		24.11	30.57	-6.46	0.71	0.61132
	PEG-24h	23.55	33.71	-10.16	-3.25	9.51366	9.45262
		23.35	33.83	-10.48	-3.18	9.06307
		23.13	33.59	-10.46	-3.29	9.78112
	NaCl-6h	22.65	31.78	-9.13	-2.22	4.65893	5.13743
		22.93	32.17	-9.24	-1.94	3.83706
		23.32	33.28	-9.96	-2.79	6.9163
	NaCl-12h	24.52	34.33	-9.81	-2.9	7.46426	6.85118
		24.14	34.12	-9.98	-2.68	6.40856
		23.98	33.89	-9.91	-2.74	6.6807
	NaCl-24h	23.33	37.4	-14.07	-7.16	143.013	146.396
		22.57	37.11	-14.54	-7.24	151.167
		22.53	36.88	-14.35	-7.18	145.009
	H2O2-6h	25.56	27.66	-2.1	6.81	0.00891222	0.00737321
		25.71	27.3	-1.59	7.71	0.00477594
		25.79	27.07	-1.28	6.89	0.00843147
	H2O2-12h	23.09	28.02	-4.93	4.8	0.0358968	0.0246352
		23.41	27.78	-4.37	5.54	0.0214928
		23.11	27.85	-4.74	5.92	0.0165159
	H2O2-24h	21.65	28.88	-7.23	5.44	0.0230355	0.0231858
		21.5	29.02	-7.52	5.68	0.0195052
		21.4	28.97	-7.57	5.21	0.0270168
	IAA-6h	23.1	25.39	-2.29	4.62	0.0406669	0.0388948
		23.1	25.89	-2.79	4.51	0.0438889
		23.32	25.53	-2.21	4.96	0.0321286
	IAA-12h	23.98	28.86	-4.88	2.03	0.244855	0.229641
		24.01	28.97	-4.96	2.34	0.19751
		24.01	29.16	-5.15	2.02	0.246558
	IAA-24h	22.73	30.57	-7.84	-0.93	1.90528	1.87997
		22.69	30.66	-7.97	-0.67	1.59107
		22.62	30.89	-8.27	-1.1	2.14355
	Root	27.08	35.55	-8.47	0	1	1
		26.96	35.5	-8.54	0	1
		26.75	35.47	-8.72	0	1
	Stem	24.11	26.63	-2.52	5.95	0.016176	0.0157972
		24.01	26.89	-2.88	5.66	0.0197774
		23.96	26.23	-2.27	6.45	0.0114382
	Leaf	24.44	31.3	-6.86	1.61	0.327598	0.353213
		24.38	31.63	-7.25	1.29	0.408951
		24.41	31.5	-7.09	1.63	0.323088
	Treatments	Ct(Gene)	Ct(Actin)	△Ct	△△Ct	Relative expression	Average expression
TPS3	con	25.85	30.9	-5.05	0	1	1
		25.34	31.32	-5.98	0	1
		25.39	31.25	-5.86	0	1
	PEG-6h	24.65	28.95	-4.3	0.75	0.594604	0.478898
		25.06	29.4	-4.34	1.64	0.320856
		25.13	30.05	-4.92	0.94	0.521233
	PEG-12h	23.86	31.12	-7.26	-2.21	4.62675	4.51282
		22.7	30.88	-8.18	-2.2	4.59479
		22.6	30.57	-7.97	-2.11	4.31691
	PEG-24h	24.56	33.71	-9.15	-4.1	17.1484	17.208
		23.66	33.83	-10.17	-4.19	18.2522
		23.71	33.59	-9.88	-4.02	16.2234
	NaCl-6h	24.19	31.78	-7.59	-2.54	5.81589	6.45329
		23.55	32.17	-8.62	-2.64	6.23332
		24.55	33.28	-8.73	-2.87	7.31065
	NaCl-12h	24.97	34.33	-9.36	-4.31	19.8353	17.0455
		23.99	34.12	-10.13	-4.15	17.7531
		24.27	33.89	-9.62	-3.76	13.5479
	NaCl-24h	24.32	37.4	-13.08	-8.03	261.379	258.395
		23.11	37.11	-14	-8.02	259.574
		23.03	36.88	-13.85	-7.99	254.232
	H2O2-6h	25.28	27.66	-2.38	3.67	0.0785633	0.0506974
		25.49	27.3	-1.81	5.17	0.0277763
		25.66	27.07	-1.41	4.45	0.0457527
	H2O2-12h	23.22	28.02	-4.8	1.53	0.346277	0.235713
		23.47	27.78	-4.31	2.28	0.205898
		23.02	27.85	-4.83	2.69	0.154963
	H2O2-24h	23.08	28.88	-5.8	1.83	0.281265	0.246612
		22.01	29.02	-7.01	2.1	0.233258
		23.02	28.97	-5.95	2.15	0.225313
	IAA-6h	23.71	25.39	-1.68	3.37	0.0967228	0.0882786
		23.4	25.89	-2.49	3.49	0.0890031
		23.33	25.53	-2.2	3.66	0.0791098
	IAA-12h	23.29	28.86	-5.57	-0.52	1.43396	1.12053
		23.24	28.97	-5.73	0.25	0.840896
		23.18	29.16	-5.98	-0.12	1.08673
	IAA-24h	22.62	30.57	-7.95	-2.9	7.46426	6.53269
		21.88	30.66	-8.78	-2.8	6.9644
		22.66	30.89	-8.23	-2.37	5.16941
	Root	24.6	35.55	-10.95	0	1	1
		24.51	35.5	-10.99	0	1
		24.85	35.47	-10.62	0	1
	Stem	23.31	26.63	-3.32	7.63	0.00504825	0.00553376
		23.18	26.89	-3.71	7.28	0.0064343
		23.22	26.23	-3.01	7.61	0.00511872
	Leaf	24.64	31.3	-6.66	4.29	0.0511189	0.0634949
		24.56	31.63	-7.07	3.92	0.0660636
		24.65	31.5	-6.85	3.77	0.0733022
	Treatments	Ct(Gene)	Ct(Actin)	△Ct	△△Ct	Relative expression	Average expression
TPS4	con	25.01	30.9	-5.89	0	1	1
		26.01	31.32	-5.31	0	1
		25.33	31.25	-5.92	0	1
	PEG-6h	30.53	28.95	1.58	7.47	0.00564035	0.00472113
		31.52	29.4	2.12	7.43	0.00579892
		32.65	30.05	2.6	8.52	0.00272411
	PEG-12h	28.13	31.12	-2.99	2.9	0.133972	0.0787243
		29.25	30.88	-1.63	3.68	0.0780207
		30.02	30.57	-0.55	5.37	0.0241807
	PEG-24h	25.37	33.71	-8.34	-2.45	5.46416	6.26109
		25.75	33.83	-8.08	-2.77	6.82108
		24.97	33.59	-8.62	-2.7	6.49802
	NaCl-6h	22.36	31.78	-9.42	-3.53	11.5514	11.1206
		23.34	32.17	-8.83	-3.52	11.4716
		23.99	33.28	-9.29	-3.37	10.3388
	NaCl-12h	23.57	34.33	-10.76	-4.87	29.2426	28.8414
		23.97	34.12	-10.15	-4.84	28.6408
		23.13	33.89	-10.76	-4.84	28.6408
	NaCl-24h	23.57	37.4	-13.83	-7.94	245.572	264.791
		23.68	37.11	-13.43	-8.12	278.204
		22.88	36.88	-14	-8.08	270.597
	H2O2-6h	25.72	27.66	-1.94	3.95	0.0647041	0.0539366
		25.31	27.3	-1.99	4.32	0.0500669
		25.56	27.07	-1.51	4.41	0.047039
	H2O2-12h	23.54	28.02	-4.48	2.23	0.213159	0.225933
		23.86	27.78	-3.92	2	0.25
		23.74	27.85	-4.11	2.22	0.214641
	H2O2-24h	22.69	28.88	-6.19	2.99	0.125869	0.177747
		23.12	29.02	-5.9	2.14	0.22688
		22.75	28.97	-6.22	2.47	0.180491
	IAA-6h	22.98	25.39	-2.41	3.48	0.0896222	0.144192
		22.75	25.89	-3.14	2.17	0.222211
		22.66	25.53	-2.87	3.05	0.120742
	IAA-12h	21.78	28.86	-7.08	-1.19	2.28153	2.61252
		21.97	28.97	-7	-1.69	3.22657
		22.02	29.16	-7.14	-1.22	2.32947
	IAA-24h	21.32	30.57	-9.25	-3.36	10.2674	10.3027
		21.75	30.66	-8.91	-3.6	12.1257
		21.88	30.89	-9.01	-3.09	8.51496
	Root	27.26	35.55	-8.29	0	1	1
		26.45	35.5	-9.05	0	1
		26.7	35.47	-8.77	0	1
	Stem	21.2	26.63	-5.43	2.86	0.137738	0.105557
		20.97	26.89	-5.92	3.13	0.114229
		21.41	26.23	-4.82	3.95	0.0647041
	Leaf	23.5	31.3	-7.8	0.49	0.712025	0.588717
		23.56	31.63	-8.07	0.98	0.50698
		23.6	31.5	-7.9	0.87	0.547147
	Treatments	Ct(Gene)	Ct(Actin)	△Ct	△△Ct	Relative expression	Average expression
TPS5	con	23.62	30.9	-7.28	0	1	1
		23.25	31.32	-8.07	0	1
		23.07	31.25	-8.18	0	1
	PEG-6h	22.3	28.95	-6.65	0.63	0.646176	0.427886
		23.75	29.4	-5.65	2.42	0.186856
		23.02	30.05	-7.03	1.15	0.450625
	PEG-12h	22.65	31.12	-8.47	-1.19	2.28153	1.32852
		22.78	30.88	-8.1	-0.03	1.02101
		22.94	30.57	-7.63	0.55	0.68302
	PEG-24h	23.22	33.71	-10.49	-3.21	9.25351	9.71654
		22.29	33.83	-11.54	-3.47	11.0809
		22.27	33.59	-11.32	-3.14	8.81524
	NaCl-6h	21.84	31.78	-9.94	-2.66	6.32033	6.03341
		21.79	32.17	-10.38	-2.31	4.95883
		22.33	33.28	-10.95	-2.77	6.82108
	NaCl-12h	23.87	34.33	-10.46	-3.18	9.06307	7.25443
		23.25	34.12	-10.87	-2.8	6.9644
		23.19	33.89	-10.7	-2.52	5.73582
	NaCl-24h	22.97	37.4	-14.43	-7.15	142.025	124.72
		22.08	37.11	-15.03	-6.96	124.5
		21.95	36.88	-14.93	-6.75	107.635
	H2O2-6h	22.23	27.66	-5.43	1.85	0.277392	0.213039
		22.01	27.3	-5.29	2.78	0.145592
		22.1	27.07	-4.97	2.21	0.216134
	H2O2-12h	19.89	28.02	-8.13	0.5	0.707107	0.598165
		19.93	27.78	-7.85	0.83	0.562529
		20.09	27.85	-7.76	0.93	0.524858
	H2O2-24h	20.4	28.88	-8.48	-0.17	1.12506	1.13057
		19.74	29.02	-9.28	-0.14	1.10191
		20.31	28.97	-8.66	-0.22	1.16473
	IAA-6h	21.86	25.39	-3.53	3.75	0.0743254	0.0563351
		21.98	25.89	-3.91	4.16	0.0559391
		22.04	25.53	-3.49	4.69	0.0387409
	IAA-12h	22.12	28.86	-6.74	0.54	0.687771	0.536053
		21.99	28.97	-6.98	1.09	0.469761
		22.13	29.16	-7.03	1.15	0.450625
	IAA-24h	21.78	30.57	-8.79	-1.51	2.8481	2.41229
		21.27	30.66	-9.39	-1.32	2.49666
		21.79	30.89	-9.1	-0.92	1.89212
	Root	21.37	35.55	-14.18	0	1	1
		21.94	35.5	-13.56	0	1
		21.37	35.47	-14.1	0	1
	Stem	22.13	26.63	-4.5	9.68	0.00121907	0.00159067
		21.84	26.89	-5.05	8.51	0.00274306
		22.4	26.23	-3.83	10.27	0.000809882
	Leaf	23.46	31.3	-7.84	6.34	0.0123444	0.0164661
		23.49	31.63	-8.14	5.42	0.023357
		23.59	31.5	-7.91	6.19	0.013697
	Treatments	Ct(Gene)	Ct(Actin)	△Ct	△△Ct	Relative expression	Average expression
TPS6	con	21.43	30.9	-9.47	0	1	1
		21.58	31.32	-9.74	0	1
		21.67	31.25	-9.58	0	1
	PEG-6h	21.66	28.95	-7.29	2.18	0.220676	0.24352
		22.03	29.4	-7.37	2.37	0.193446
		22.13	30.05	-7.92	1.66	0.316439
	PEG-12h	22.13	31.12	-8.99	0.48	0.716978	0.564382
		21.89	30.88	-8.99	0.75	0.594604
		22.38	30.57	-8.19	1.39	0.381565
	PEG-24h	21.95	33.71	-11.76	-2.29	4.89056	5.86654
		21.28	33.83	-12.55	-2.81	7.01285
		21.5	33.59	-12.09	-2.51	5.6962
	NaCl-6h	19.92	31.78	-11.86	-2.39	5.24157	6.59083
		19.87	32.17	-12.3	-2.56	5.89708
		20.59	33.28	-12.69	-3.11	8.63383
	NaCl-12h	22.65	34.33	-11.68	-2.21	4.62675	3.74187
		22.58	34.12	-11.54	-1.8	3.4822
		22.67	33.89	-11.22	-1.64	3.11666
	NaCl-24h	22.88	37.4	-14.52	-5.05	33.1285	31.3053
		22.49	37.11	-14.62	-4.88	29.446
		22.33	36.88	-14.55	-4.97	31.3414
	H2O2-6h	20.84	27.66	-6.82	2.65	0.15932	0.124786
		21.67	27.3	-5.63	4.11	0.0579118
		21.16	27.07	-5.91	2.67	0.157127
	H2O2-12h	19.27	28.02	-8.75	1.54	0.343885	0.267719
		19.26	27.78	-8.52	1.83	0.281265
		19.95	27.85	-7.9	2.49	0.178006
	H2O2-24h	20.09	28.88	-8.79	2.01	0.248273	0.22957
		20.01	29.02	-9.01	2.49	0.178006
		20.4	28.97	-8.57	1.93	0.262429
	IAA-6h	20.5	25.39	-4.89	4.58	0.0418102	0.0497427
		20.24	25.89	-5.65	4.09	0.0587202
		20.31	25.53	-5.22	4.36	0.0486978
	IAA-12h	21.93	28.86	-6.93	2.54	0.171943	0.176919
		21.85	28.97	-7.12	2.62	0.162668
		21.93	29.16	-7.23	2.35	0.196146
	IAA-24h	21.14	30.57	-9.43	0.04	0.972655	1.01558
		21.07	30.66	-9.59	0.15	0.90125
		21.08	30.89	-9.81	-0.23	1.17283
	Root	22.29	35.55	-13.26	0	1	1
		22.78	35.5	-12.72	0	1
		22.44	35.47	-13.03	0	1
	Stem	19.5	26.63	-7.13	6.13	0.0142786	0.0162064
		19.58	26.89	-7.31	5.41	0.0235195
		19.73	26.23	-6.5	6.53	0.0108212
	Leaf	21.37	31.3	-9.93	3.33	0.0994421	0.138271
		21.33	31.63	-10.3	2.42	0.186856
		21.43	31.5	-10.07	2.96	0.128514
	Treatments	Ct(Gene)	Ct(Actin)	△Ct	△△Ct	Relative expression	Average expression
TPS7	con	23.15	30.9	-7.75	0	1	1
		23.54	31.32	-7.78	0	1
		23.38	31.25	-7.87	0	1
	PEG-6h	23.3	28.95	-5.65	2.1	0.233258	0.269331
		23.75	29.4	-5.65	2.13	0.228458
		23.71	30.05	-6.34	1.53	0.346277
	PEG-12h	23.03	31.12	-8.09	-0.34	1.26576	1.06843
		22.92	30.88	-7.96	-0.18	1.13288
		23.01	30.57	-7.56	0.31	0.806642
	PEG-24h	22.99	33.71	-10.72	-2.97	7.83536	7.46551
		22.97	33.83	-10.86	-3.08	8.45614
		23.11	33.59	-10.48	-2.61	6.10504
	NaCl-6h	22.13	31.78	-9.65	-1.9	3.73213	4.35961
		22.57	32.17	-9.6	-1.82	3.53081
		22.87	33.28	-10.41	-2.54	5.81589
	NaCl-12h	24.15	34.33	-10.18	-2.43	5.38893	5.11788
		23.85	34.12	-10.27	-2.49	5.61778
		23.9	33.89	-9.99	-2.12	4.34694
	NaCl-24h	22.01	37.4	-15.39	-7.64	199.466	194.16
		21.69	37.11	-15.42	-7.64	199.466
		21.49	36.88	-15.39	-7.52	183.546
	H2O2-6h	22.89	27.66	-4.77	2.98	0.126745	0.112857
		23.9	27.3	-3.4	4.38	0.0480273
		22.81	27.07	-4.26	2.61	0.163799
	H2O2-12h	21.25	28.02	-6.77	1.8	0.287175	0.234214
		21.75	27.78	-6.03	2.36	0.194791
		21.35	27.85	-6.5	2.18	0.220676
	H2O2-24h	20.97	28.88	-7.91	1.89	0.269807	0.358596
		21.01	29.02	-8.01	1.21	0.432269
		20.89	28.97	-8.08	1.42	0.373712
	IAA-6h	22.03	25.39	-3.36	4.39	0.0476956	0.0537116
		22.09	25.89	-3.8	3.98	0.0633725
		21.98	25.53	-3.55	4.32	0.0500669
	IAA-12h	22.6	28.86	-6.26	1.49	0.356013	0.385701
		22.52	28.97	-6.45	1.33	0.397768
		22.6	29.16	-6.56	1.31	0.403321
	IAA-24h	21.7	30.57	-8.87	-1.12	2.17347	2.51804
		21.61	30.66	-9.05	-1.27	2.41162
		21.45	30.89	-9.44	-1.57	2.96905
	Root	22.64	35.55	-12.91	0	1	1
		22.49	35.5	-13.01	0	1
		22.59	35.47	-12.88	0	1
	Stem	21.69	26.63	-4.94	7.97	0.00398833	0.00364755
		21.66	26.89	-5.23	7.78	0.00454974
		22.05	26.23	-4.18	8.7	0.00240458
	Leaf	22.99	31.3	-8.31	4.6	0.0412346	0.042358
		23.32	31.63	-8.31	4.7	0.0384733
		23.02	31.5	-8.48	4.4	0.0473661

## Sheet: sucrose and mannitol
	Treatments	Ct(Gene)	Ct(Actin)	△Ct	△Ct (con)	△△Ct	Relative expression	Average expression		Treatments	Ct(Gene)	Ct(Actin)	△Ct	△Ct (con)	△△Ct	Relative expression	Average expression
TPS1	0h（biological replicates）	23.02	20	3.02	3.02	0	1	1	TPS5	0h	22.65	20	2.65	2.65	0	1	1
		23.24	20.23	3.01	3.01	0	1				22.64	20.23	2.41	2.41	0	1
		23.25	20.18	3.07	3.07	0	1				22.88	20.18	2.7	2.7	0	1
	sucrose-6h	24.75	20.17	4.58	3.02	1.56	0.339151	0.344298		sucrose-6h	23.54	20.17	3.37	2.65	0.72	0.607097	0.698057
		25.16	20.38	4.78	3.01	1.77	0.293209				23.42	20.38	3.04	2.41	0.63	0.646176
		25.46	21.07	4.39	3.07	1.32	0.400535				24.02	21.07	2.95	2.7	0.25	0.840896
	sucrose-12h	22.73	21.63	1.1	3.02	-1.92	3.78423	3.95797		sucrose-12h	23.41	21.63	1.78	2.65	-0.87	1.82766	1.54102
		23.17	22.55	0.62	3.01	-2.39	5.24157				24.2	22.55	1.65	2.41	-0.76	1.69349
		23.01	21.45	1.56	3.07	-1.51	2.8481				24.01	21.45	2.56	2.7	-0.14	1.10191
	sucrose-24h	21.81	21.96	-0.15	3.02	-3.17	9.00047	7.32042		sucrose-24h	22.21	21.96	0.25	2.65	-2.4	5.27803	4.99914
		22.05	22.11	-0.06	3.01	-3.07	8.39773				22.19	22.11	0.08	2.41	-2.33	5.02805
		21.91	21.03	0.88	3.07	-2.19	4.56305				21.5	21.03	0.47	2.7	-2.23	4.69134
	mannitol-6h	25.02	22.2	2.82	3.02	-0.2	1.1487	0.983447		mannitol-6h	23.54	22.2	1.34	2.65	-1.31	2.47942	1.72455
		25.25	21.34	3.91	3.01	0.9	0.535887				23.1	21.34	1.76	2.41	-0.65	1.56917
		25.43	22.7	2.73	3.07	-0.34	1.26576				25.23	22.7	2.53	2.7	-0.17	1.12506
	mannitol-12h	23.06	20.39	2.67	3.02	-0.35	1.27456	1.23029		mannitol-12h	23.36	20.39	2.97	2.65	0.32	0.80107	0.638635
		23.08	20.25	2.83	3.01	-0.18	1.13288				23.7	20.25	3.45	2.41	1.04	0.486327
		22.98	20.27	2.71	3.07	-0.36	1.28343				23.64	20.27	3.37	2.7	0.67	0.628507
	mannitol-24h	22.46	18.49	3.97	3.02	0.95	0.517632	0.537612		mannitol-24h	22.81	18.49	4.32	2.65	1.67	0.314253	0.338017
		22.43	18.72	3.71	3.01	0.7	0.615572				22.64	18.72	3.92	2.41	1.51	0.351111
		22.7	18.57	4.13	3.07	1.06	0.479632				22.79	18.57	4.22	2.7	1.52	0.348686
	Treatments	Ct(Gene)	Ct(Actin)	△Ct	△Ct (con)	△△Ct	Relative expression	Average expression		Treatments	Ct(Gene)	Ct(Actin)	△Ct	△Ct (con)	△△Ct	Relative expression	Average expression
TPS2	0h	23.87	20	3.87	3.87	0	1	1	TPS6	0h	21.36	20	1.36	1.36	0	1	1
		24.14	20.23	3.91	3.91	0	1				21.16	20.23	0.93	0.93	0	1
		24.35	20.18	4.17	4.17	0	1				21.45	20.18	1.27	1.27	0	1
	sucrose-6h	23.3	20.17	3.13	3.87	-0.74	1.67018	1.75743		sucrose-6h	23.32	20.17	3.15	1.36	1.79	0.289172	0.388347
		24.24	20.38	3.86	3.91	-0.05	1.03526				23.14	20.38	2.76	0.93	1.83	0.281265
		23.88	21.07	2.81	4.17	-1.36	2.56685				23.09	21.07	2.02	1.27	0.75	0.594604
	sucrose-12h	23.5	21.63	1.87	3.87	-2	4	5.51435		sucrose-12h	22.95	21.63	1.32	1.36	-0.04	1.02811	1.03939
		23.71	22.55	1.16	3.91	-2.75	6.72717				23.12	22.55	0.57	0.93	-0.36	1.28343
		23.08	21.45	1.63	4.17	-2.54	5.81589				23.03	21.45	1.58	1.27	0.31	0.806642
	sucrose-24h	23.74	21.96	1.78	3.87	-2.09	4.25748	5.06117		sucrose-24h	20.77	21.96	-1.19	1.36	-2.55	5.85634	3.86746
		23.27	22.11	1.16	3.91	-2.75	6.72717				21.14	22.11	-0.97	0.93	-1.9	3.73213
		23.13	21.03	2.1	4.17	-2.07	4.19887				21.29	21.03	0.26	1.27	-1.01	2.01391
	mannitol-6h	23.58	22.2	1.38	3.87	-2.49	5.61778	4.19405		mannitol-6h	22.82	22.2	0.62	1.36	-0.74	1.67018	1.10185
		23.29	21.34	1.95	3.91	-1.96	3.89062				23.06	21.34	1.72	0.93	0.79	0.578344
		25.25	22.7	2.55	4.17	-1.62	3.07375				23.89	22.7	1.19	1.27	-0.08	1.05702
	mannitol-12h	23.86	20.39	3.47	3.87	-0.4	1.31951	1.23971		mannitol-12h	23.5	20.39	3.11	1.36	1.75	0.297302	0.247597
		23.99	20.25	3.74	3.91	-0.17	1.12506				23.45	20.25	3.2	0.93	2.27	0.20733
		24.09	20.27	3.82	4.17	-0.35	1.27456				23.61	20.27	3.34	1.27	2.07	0.238159
	mannitol-24h	24.47	18.49	5.98	3.87	2.11	0.231647	0.314488		mannitol-24h	21.25	18.49	2.76	1.36	1.4	0.378929	0.403711
		24.24	18.72	5.52	3.91	1.61	0.327598				20.91	18.72	2.19	0.93	1.26	0.417544
		24.12	18.57	5.55	4.17	1.38	0.384219				21.11	18.57	2.54	1.27	1.27	0.41466
	Treatments	Ct(Gene)	Ct(Actin)	△Ct	△Ct (con)	△△Ct	Relative expression	Average expression		Treatments	Ct(Gene)	Ct(Actin)	△Ct	△Ct (con)	△△Ct	Relative expression	Average expression
TPS3	0h	23.95	20	3.95	3.95	0	1	1	TPS7	0h	24.47	20	4.47	4.47	0	1	1
		24.02	20.23	3.79	3.79	0	1				24.44	20.23	4.21	4.21	0	1
		24.18	20.18	4	4	0	1				24.61	20.18	4.43	4.43	0	1
	sucrose-6h	22.58	20.17	2.41	3.95	-1.54	2.90795	3.51242		sucrose-6h	23.83	20.17	3.66	4.47	-0.81	1.75321	1.66057
		22.51	20.38	2.13	3.79	-1.66	3.16017				23.85	20.38	3.47	4.21	-0.74	1.67018
		22.91	21.07	1.84	4	-2.16	4.46915				24.86	21.07	3.79	4.43	-0.64	1.55833
	sucrose-12h	21.58	21.63	-0.05	3.95	-4	16	16.3701		sucrose-12h	22.23	21.63	0.6	4.47	-3.87	14.6213	13.1209
		22.05	22.55	-0.5	3.79	-4.29	19.5622				22.98	22.55	0.43	4.21	-3.78	13.737
		21.69	21.45	0.24	4	-3.76	13.5479				22.42	21.45	0.97	4.43	-3.46	11.0043
	sucrose-24h	22.1	21.96	0.14	3.95	-3.81	14.0257	12.1677		sucrose-24h	23.26	21.96	1.3	4.47	-3.17	9.00047	7.40195
		22.29	22.11	0.18	3.79	-3.61	12.2101				23.32	22.11	1.21	4.21	-3	8
		21.67	21.03	0.64	4	-3.36	10.2674				23.08	21.03	2.05	4.43	-2.38	5.20537
	mannitol-6h	22.6	22.2	0.4	3.95	-3.55	11.7127	11.2425		mannitol-6h	23.98	22.2	1.78	4.47	-2.69	6.45313	6.29255
		21.8	21.34	0.46	3.79	-3.33	10.0561				23.21	21.34	1.87	4.21	-2.34	5.06303
		23.12	22.7	0.42	4	-3.58	11.9588				24.25	22.7	1.55	4.43	-2.88	7.3615
	mannitol-12h	22.77	20.39	2.38	3.95	-1.57	2.96905	2.46925		mannitol-12h	23.87	20.39	3.48	4.47	-0.99	1.98618	1.91623
		22.87	20.25	2.62	3.79	-1.17	2.25012				23.62	20.25	3.37	4.21	-0.84	1.79005
		23.14	20.27	2.87	4	-1.13	2.18859				23.72	20.27	3.45	4.43	-0.98	1.97247
	mannitol-24h	23.06	18.49	4.57	3.95	0.62	0.650671	0.692714		mannitol-24h	23.68	18.49	5.19	4.47	0.72	0.607097	0.591067
		23.1	18.72	4.38	3.79	0.59	0.664343				23.64	18.72	4.92	4.21	0.71	0.61132
		22.96	18.57	4.39	4	0.39	0.76313				23.85	18.57	5.28	4.43	0.85	0.554785
	Treatments	Ct(Gene)	Ct(Actin)	△Ct	△Ct (con)	△△Ct	Relative expression	Average expression
TPS4	0h	22.77	20	2.77	2.77	0	1	1
		22.91	20.23	2.68	2.68	0	1
		23.18	20.18	3	3	0	1
	sucrose-6h	21.31	20.17	1.14	2.77	-1.63	3.09513	3.02778
		22.01	20.38	1.63	2.68	-1.05	2.07053
		22.1	21.07	1.03	3	-1.97	3.91768
	sucrose-12h	20.46	21.63	-1.17	2.77	-3.94	15.3482	16.1456
		20.97	22.55	-1.58	2.68	-4.26	19.1597
		20.65	21.45	-0.8	3	-3.8	13.9288
	sucrose-24h	21.36	21.96	-0.6	2.77	-3.37	10.3388	8.81786
		21.75	22.11	-0.36	2.68	-3.04	8.22491
		21.05	21.03	0.02	3	-2.98	7.88986
	mannitol-6h	22.55	22.2	0.35	2.77	-2.42	5.35171	4.23937
		22.37	21.34	1.03	2.68	-1.65	3.13834
		23.62	22.7	0.92	3	-2.08	4.22807
	mannitol-12h	22.12	20.39	1.73	2.77	-1.04	2.05623	1.90496
		22.2	20.25	1.95	2.68	-0.73	1.65864
		22.27	20.27	2	3	-1	2
	mannitol-24h	22.6	18.49	4.11	2.77	1.34	0.395021	0.491131
		22.46	18.72	3.74	2.68	1.06	0.479632
		22.31	18.57	3.74	3	0.74	0.598739
